# Supplementary material
Source: PubMed Central journal article supplement (PMC3265146)
Supplement: la203078w_si_001.pdf [file la203078w_si_001.pdf]

Supplementary material

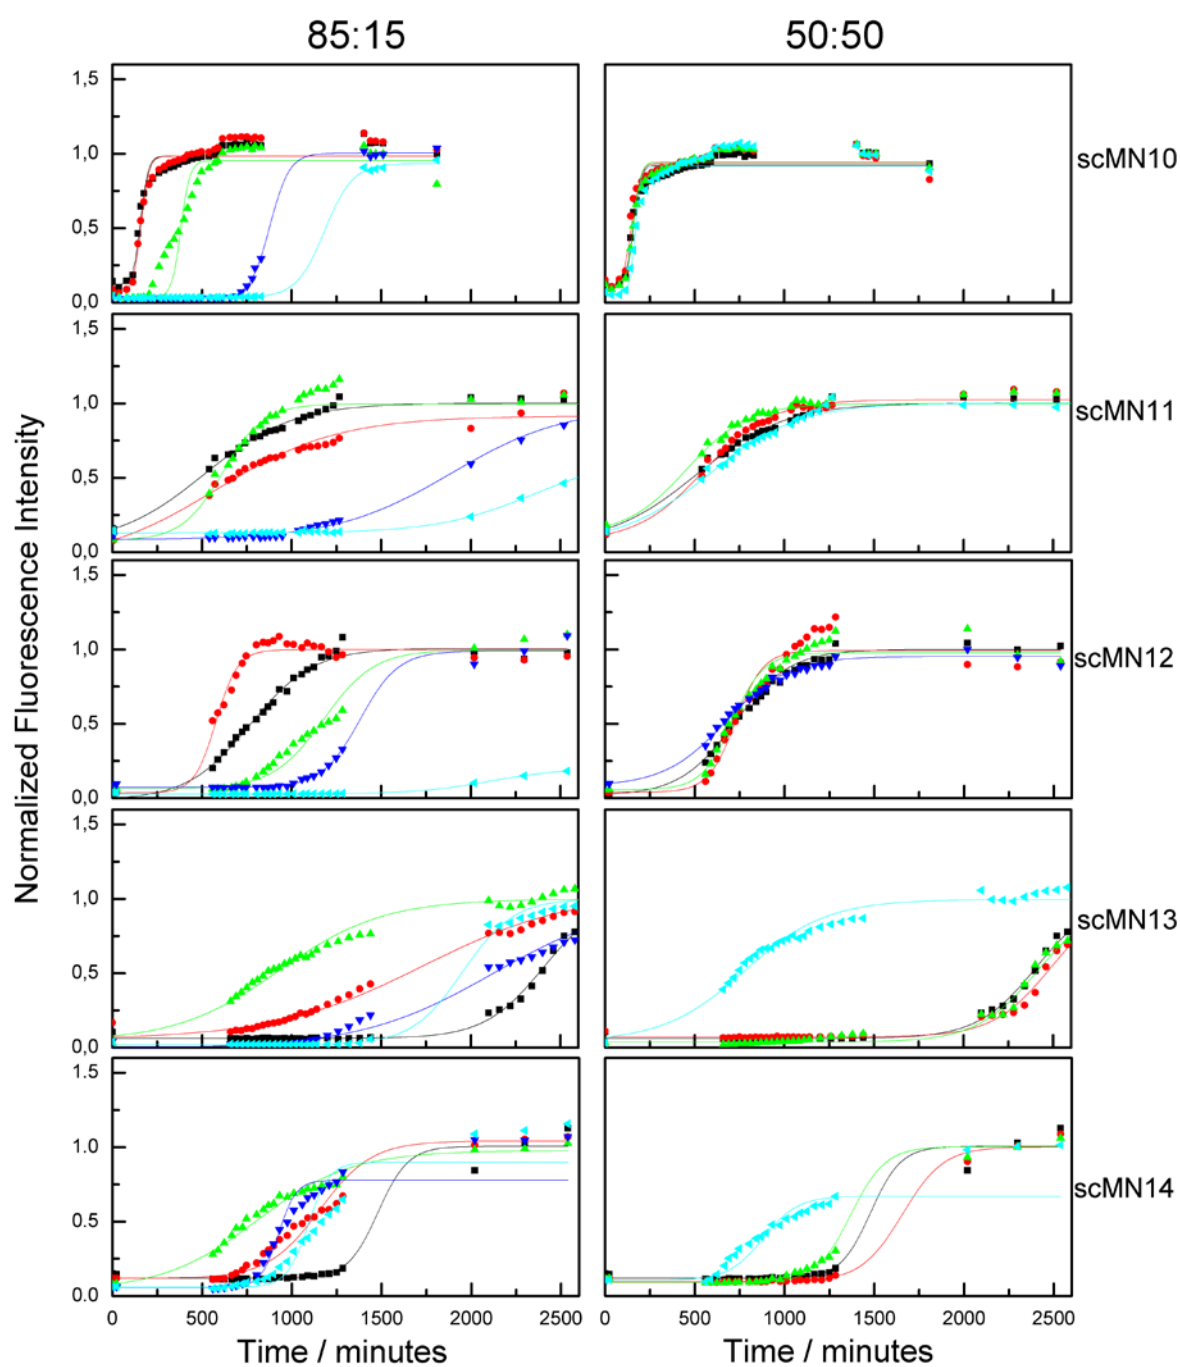

**Figure S1.** . Fibrillation kinetics of single-chain monellin (scMN parent and mutants) at 37°C monitored by temporal development of ThT fluorescence at different 85:15 and 50:50 NiPAM:BAM nanoparticle concentrations: (■) 0, (●) 1, (▲) 3, (▼) 10, (◄) 30  $\mu\text{g}/\text{mL}$  (8.1-270 pM). Lines represent best fitting to eq. 1. Error bars are not included for clarity.
